# Supplementary material for: Measurement of fluid viscosity based on pressure-driven flow digital-printed microfluidics
Source: Royal Society of Chemistry journal article supplement (doi:10.1039/d4an01550a), 2025-01-01
Supplement: d4an01550a5.pdf [file d4an01550a5.pdf]

# Measurement of fluid viscosity based on pressure-driven flow digital-printed microfluidics

Yan Ge <sup>a,b</sup>, Xingxing Huang <sup>a,b</sup>, Baojian Zhang <sup>c</sup>, Zhixiong Song <sup>d</sup>, Xusheng Tang <sup>a,b</sup>, Shuai Shao <sup>a,b</sup>, Lujiale Guo <sup>c</sup>, Peng Liang <sup>a,b,d,\*</sup>, Bei Li <sup>a,b,d,\*</sup>

<sup>a</sup>Changchun Institute of Optics, Fine Mechanics and Physics, Chinese Academy of Sciences, Changchun 130033, P. R. China

<sup>b</sup>University of Chinese Academy of Sciences, Beijing 100049, P. R. China

<sup>c</sup>School of Ophthalmology & Optometry, Eye Hospital, Wenzhou Medical University, Wenzhou 325027, P.R. China

<sup>d</sup>Hooke Instruments Ltd, Changchun 130031, P. R. China

<sup>e</sup>Zhongshan Hospital of Fudan University, Shanghai 200032, P.R. China

Authors to whom correspondence should be addressed: [liangpeng1@ciomp.ac.cn](mailto:liangpeng1@ciomp.ac.cn) (P. Liang) and [beili@ciomp.ac.cn](mailto:beili@ciomp.ac.cn) (B. Li)

---

## Supplementary Material

### A. The relationship between the average flow velocity and the central linear flow velocity

Momentum equation for one-dimensional constant incompressible flow considering slit-type cross section

$$\mu \frac{\partial^2 u}{\partial z^2} = \frac{\partial P}{\partial x} \quad (1)$$

- $\mu$  : Dynamic viscosity of the fluid.
- $u$  : Velocity of the fluid in the x-direction.
- $z$  : Coordinate perpendicular to the flow direction.
- $\frac{\partial P}{\partial x}$  : Pressure gradient in the flow direction x.

integrating the equation,

$$u(z) = \frac{1}{2\mu} \left(-\frac{\partial P}{\partial x}\right) z^2 + C_1 z + C_2 \quad \square(2)$$

Where  $C_1$  and  $C_2$  are integration constants. Bringing in the boundary conditions  $u(\pm \frac{H}{2}) = 0$ .  $H$  is height of the channel.

Determining the constant of integration, the flow velocity distribution is obtained as,

$$u(z) = \frac{1}{2\mu} \left(-\frac{\partial P}{\partial x}\right) \left(\frac{H^2}{4} - z^2\right) \quad (3)$$

where  $z = 0$ , taking the maximum flow velocity at the centerline of the flow channel.

$$u_{\max} = \frac{H^2}{8\mu} \left(-\frac{\partial P}{\partial x}\right) \quad (4)$$

The average flow velocity of the flow channel is that,

$$u_{avg} = \frac{1}{H} \int_{-2/H}^{2/H} \frac{1}{2\mu} \left(-\frac{\partial P}{\partial x}\right) \left(\frac{H^2}{4} - z^2\right) dz \quad (5)$$

integrating the equation,

$$u_{avg} = \frac{H^2}{12\mu} \left(-\frac{\partial P}{\partial x}\right) \quad (6)$$

The relationship between average flow velocity and centerline flow velocity is ,

$$v(t) = u_{avg} = \frac{2}{3} u_{max} \quad (7)$$

## B. Darcy friction factor

From Eq. (6) in the main text, the pressure drop versus flow velocity for a slit-type flow channel cross-section is given by ,

$$\Delta p = \frac{12\mu L Q}{wh^3} \quad (8)$$

- $\Delta p$  : Pressure drop along the flow channel.
- $\mu$  : Dynamic viscosity of the fluid.
- $w$  : Width and height of the flow channel.
- $h$  : Height of the flow channel.
- $Q$  : Flow rate.

Flow rate  $Q = vA = whv$ ,  $v$  is the average flow velocity,

$$\Delta p = \frac{12\mu v L}{h^2} \quad (9)$$

combining the Darcy-Weisbach equation,

$$\Delta p = \rho h_f = \lambda \frac{L}{D_e} \frac{\rho v^2}{2g} \quad (10)$$

- $\rho$  : Density of the fluid.
- $h_f$  : Darcy friction factor.
- $w$  : Width and height of the flow channel.

where  $D_e$  is the hydraulic radius, which is defined as 4 times the cross-sectional area divided by the wetted circumference and can be expressed as,

$$D_e = \frac{4A}{P} = \frac{2wh}{w+h} \quad (11)$$

when the rectangular section is a slit section, that is, shape, i.e.  $w$  is much larger than  $h$ , then

$w+h \approx w$ , can be simplified to  $D_e = 2h$ .

Compare (8) with (9), get

$$\lambda = \frac{48\mu}{\rho\nu H^2} \quad (12)$$

Combined with Reynolds number, the expression formula is obtained.

$$\text{Re} = \frac{\rho\nu D_e}{\mu} \quad (13)$$

Darcy friction factor for rectangular cross-section with a large aspect ratio is

$$\lambda = \frac{96}{\text{Re}} \quad (14)$$

### C. Figure S 1

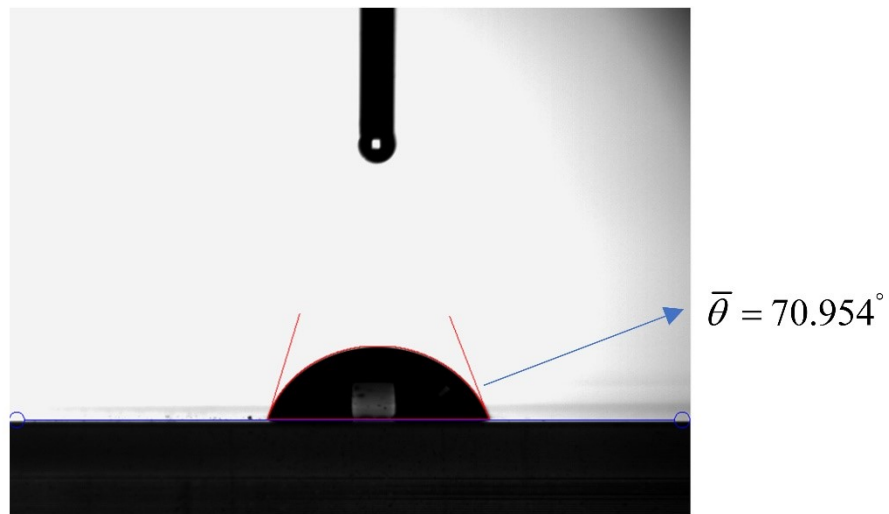

**Figure S 1.** Measurement results of contact angle

**D. Figure S 2**

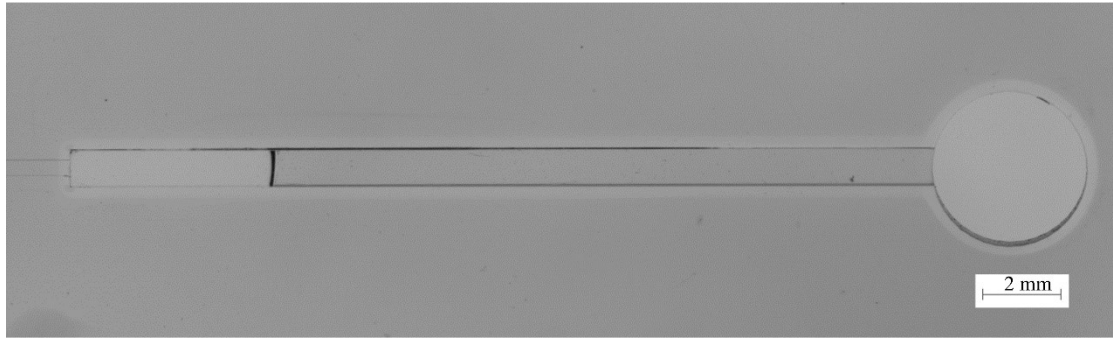

**Figure S 2.** liquid flow sequence

### E. Figure S 3

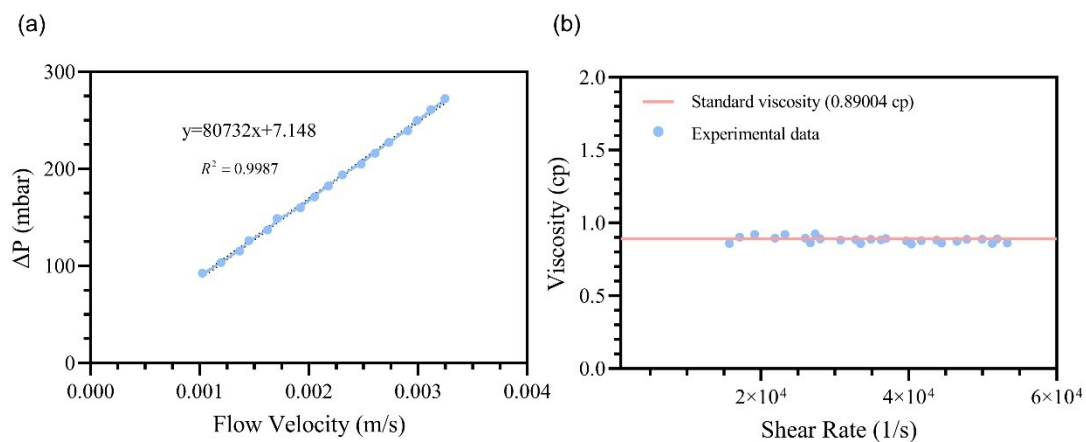

**Figure S 3.** The viscosity of water. (a) Pressure versus flow velocity relationship graph. The linear relationship indicates the Newtonian fluid characteristics of water. (b) Measured viscosity of water at 25° C, with the geometric correction factor allowing the measured value to match the standard value of 0.89004 cP.
