# Supplementary figures and images for: Measurement of fluid viscosity based on pressure-driven flow digital-printed microfluidics
Source: Royal Society of Chemistry journal article supplement (doi:10.1039/d4an01550a), 2025-01-01

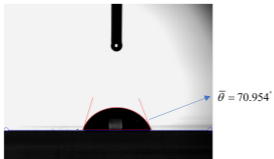

Supplement: d4an01550a2.pdf [file d4an01550a2.pdf]

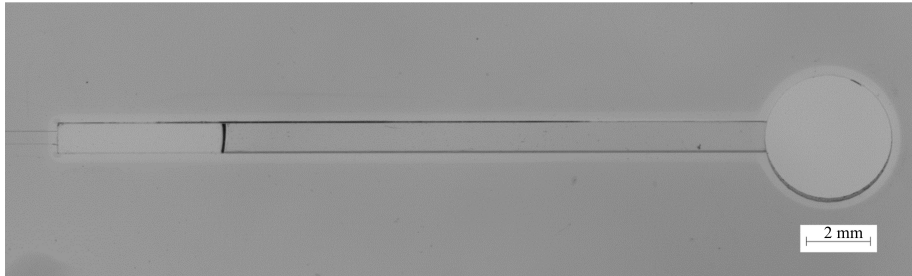

Supplement: d4an01550a3.pdf [file d4an01550a3.pdf]

(a)

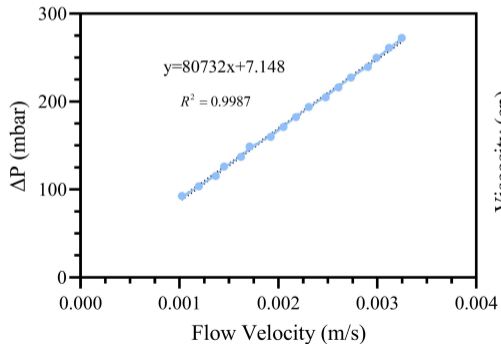

(b)

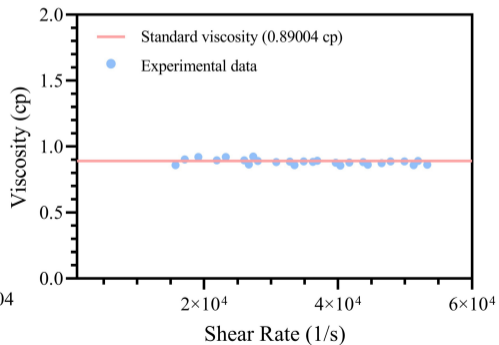

Supplement: d4an01550a4.pdf [file d4an01550a4.pdf]
